# Supplementary material
Source: publisher site journal article supplement (https://www.spandidos-publications.com/1264/downloadSupplementary)

Figure S1. C33-A and MCF-7 cell stable clone selection with plasmids coding for E7 from HPV16 (pE7/HPV16) and E6/E7 of HPV18 (pE6/E7). To select a negative model to HPV, cell lines C33-A and MCF-7, as well as their stable clones C33-A pE7/HPV16 and MCF-7 pE6/E7 were analyzed to determine (A) the methylation status of the *CDH1* promoter region by the MSP technique, (B) the level of mRNA expression of *CDH1* (E-cadherin), E7 HPV16, E7 HPV18 and GAPDH by RT-PCR and (C) the protein expression of E-cadherin and  $\beta$ -actin by western blotting. HPV, human papilloma virus; *CDH1*, cadherin 1; MSP, methylation-specific PCR; RT-PCR, reverse transcription-PCR.

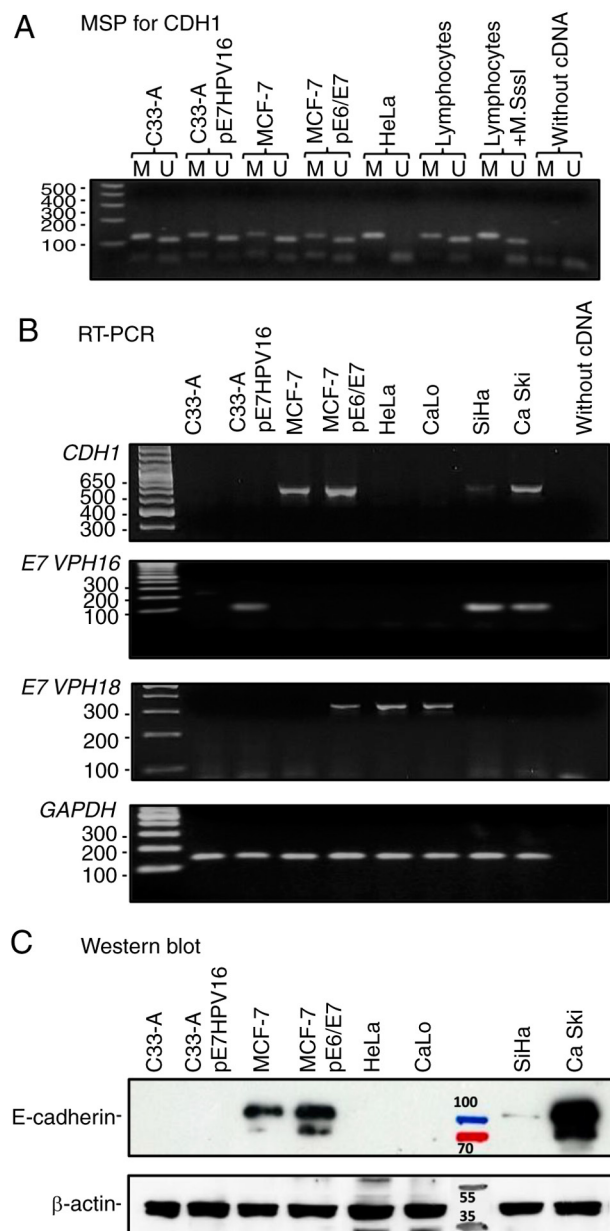

Figure S2. Quantitative PCR was performed to determine the expression levels of *CDH1*, *SNAI1*, *GAPDH* and  $\beta$ -actin mRNA in HaCaT, HeLa, SiHa and Ca Ski cell lines. A commercial sample of normal cervix negative for HPV (Human Cervix Total RNA) was used as a reference to obtain the relative values. The  $\Delta C_t$  values of each gene were normalized to the reference gene  $\beta$ -actin using the  $2^{\Delta\Delta C_q}$  method.

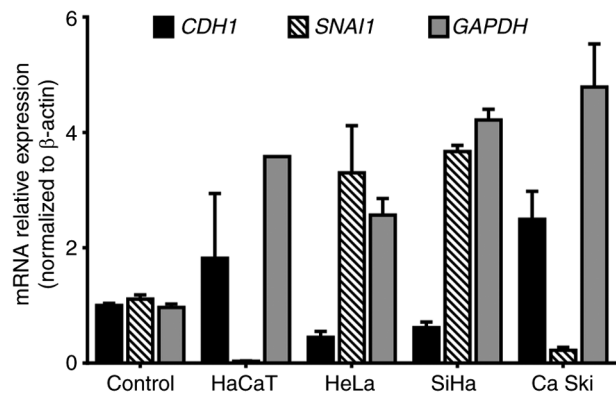

Supplement: Supplementary file 1 [file downloadSupplementary]
